# Supplementary material for: Ionic liquids: anion effect on the reaction of O,O-diethyl O-(2,4-dinitrophenyl) phosphate triester with piperidine
Source: Royal Society of Chemistry journal article supplement (doi:10.1039/c4nj02121e), 2014-12-23

**Ionic Liquids: Anion effect on the reaction of *O*, *O*-diethyl *O*-  
(2,4-dinitrophenyl) phosphate triester with piperidine.**

Paulina Pavez,<sup>a\*</sup> Daniela Millán<sup>a</sup>, Cristian Cocq<sup>a</sup>, José G. Santos<sup>a</sup>, Faruk Nome<sup>b</sup>.

<sup>a</sup>Facultad de Química. Pontificia Universidad Católica de Chile. Casilla 306, Santiago 6094411, Chile. <sup>b</sup>INCT-Catálise, Departamento de Química, Universidade Federal de Santa Catarina, Florianópolis, SC, 88040-970, Brasil.

**Author Information**

\*Corresponding authors. Tel.: +56-02-23541743; fax: +56-02-26864744; e-mail: [ppavezg@uc.cl](mailto:ppavezg@uc.cl)

**Present address:** Facultad de Química, Pontificia Universidad Católica de Chile, Av. Vicuña Mackenna 4860, Santiago 6094411, Chile.

## Electronic supplementary information

| Table of contents                                                                                                                                                                                                                    |  |
|--------------------------------------------------------------------------------------------------------------------------------------------------------------------------------------------------------------------------------------|--|
| <b>Table S1:</b> Pseudo-first-order rate constants ( $k_{\text{obsd}}$ ) for the reaction of <b>1</b> with piperidine in different ionic liquids at 25°C.                                                                            |  |
| <b>Table S2:</b> Pseudo-first-order rate constants ( $k_{\text{obsd}}$ ) for the reaction of <b>1</b> with piperidine in organic solvents (COS) at 25°C.                                                                             |  |
| <b>Table S3:</b> Relative products distribution (%) for the nucleophilic attack of piperidine to <b>1</b> in the solvent used.                                                                                                       |  |
| <b>Table S4:</b> $\pi^*$ Kamlet-Taft's parameters ( $\alpha$ , $\beta$ , $\pi^*$ )                                                                                                                                                   |  |
| <b>Table S5:</b> Statistical data from the multiple regression procedure including $\alpha$ , $\beta$ , $\pi^*$ Kamlet-Taft's parameters                                                                                             |  |
| <b>Figure S1:</b> $^{31}\text{P}$ -NMR spectrum (400MHz) of <i>O,O</i> -diethyl piperidinophosphate diester ( <b>2a</b> ) obtained in the reaction of <i>O,O</i> -diethyl chlorophosphate with piperidine in [Bmim]BF <sub>4</sub> . |  |
| <b>Figure S2:</b> $^{31}\text{P}$ -NMR spectrum (400MHz) of <i>O,O</i> -diethyl phosphate acid ( <b>2b</b> ) obtained in the reaction of <i>O,O</i> -diethyl chlorophosphate with NaOH in [Bmim]BF <sub>4</sub> .                    |  |
| <b>Figure S3:</b> <b>Figure S3:</b> $^{31}\text{P}$ -NMR spectrum for the reaction of <b>1</b> with piperidine in [Bmim]PF <sub>6</sub> at 25°C.                                                                                     |  |
| <b>Figure S4:</b> $^{31}\text{P}$ -NMR spectrum for the reaction of <b>1</b> with piperidine in [Bmim]NTf <sub>2</sub> at 25°C.                                                                                                      |  |
| <b>Figure S5:</b> $^{31}\text{P}$ -NMR spectrum for the reaction of <b>1</b> with piperidine in [Bmim]OTf at 25°C                                                                                                                    |  |
| <b>Figure S6:</b> $^{31}\text{P}$ -NMR spectrum for the reaction of <b>1</b> with piperidine in [Em <sub>2</sub> pAm]NTf <sub>2</sub> at 25°C.                                                                                       |  |
| <b>Figure S7:</b> $^{31}\text{P}$ -NMR spectrum for the reaction of <b>1</b> with piperidine in [B <sub>2</sub> mim]BF <sub>4</sub> at 25°C.                                                                                         |  |
| <b>Figure S8:</b> $^{31}\text{P}$ -NMR spectrum for the reaction of <b>1</b> with piperidine in [Bmpyrr]NTf <sub>2</sub> at 25°C.                                                                                                    |  |
| <b>Figure S9:</b> $^{31}\text{P}$ -NMR spectrum for the reaction of <b>1</b> with piperidine in [Bmpyrr]OTf at 25°C.                                                                                                                 |  |
| <b>Figure S10:</b> $^{31}\text{P}$ -NMR spectrum for the reaction of <b>1</b> with piperidine in [B <sub>2</sub> mim]NTf <sub>2</sub> at 25°C.                                                                                       |  |
| <b>Figure S11:</b> $^{31}\text{P}$ -NMR spectrum for the reaction of <b>1</b> with piperidine in H <sub>2</sub> O (pH=pK <sub>a</sub> ) at 25°C.                                                                                     |  |
| <b>Figure S12:</b> $^{31}\text{P}$ -NMR spectrum for the reaction of <b>1</b> with piperidine in DMSO at 25°C.                                                                                                                       |  |
| <b>Figure S13:</b> $^{31}\text{P}$ -NMR spectrum for the reaction of <b>1</b> with piperidine in acetonitrile at 25°C.                                                                                                               |  |
| <b>Figure S14:</b> $^{31}\text{P}$ -NMR spectrum for the reaction of <b>1</b> with piperidine in [Bmim]DCA at 25°C.                                                                                                                  |  |
| <b>Figure S15:</b> $^{31}\text{P}$ -NMR spectrum for the reaction of <b>1</b> with piperidine in [Bmpyrr]DCA at 25°C.                                                                                                                |  |
| <b>Figure S16:</b> $^{31}\text{P}$ -NMR spectrum for the reaction of <b>1</b> with piperidine in [Bmpy]DCA at 25°C.                                                                                                                  |  |
| <b>Figure S17:</b> Correlation between $\log k_N^{\text{Ar}}$ and the solvent hydrogen bond acceptor capacity ( $\beta$ ) for a series of ionic liquids.                                                                             |  |

**Table S1:** Pseudo-first-order rate constants ( $k_{\text{obsd}}$ ) for the reaction of **1** with piperidine in different ionic liquids at 25°C.

| <b>[Bmim]BF<sub>4</sub></b>             |                                     | <b>[Bmim]PF<sub>6</sub></b>              |                                     | <b>[Bmim]DCA</b>                          |                                     |
|-----------------------------------------|-------------------------------------|------------------------------------------|-------------------------------------|-------------------------------------------|-------------------------------------|
| $10^3[\text{Amine}]/\text{M}$           | $10^3k_{\text{obsd}}/\text{s}^{-1}$ | $10^3[\text{Amine}]/\text{M}$            | $10^3k_{\text{obsd}}/\text{s}^{-1}$ | $10^3[\text{Amine}]/\text{M}$             | $10^3k_{\text{obsd}}/\text{s}^{-1}$ |
| 4.32                                    | 1.87                                | 2.17                                     | 4.43                                | 1.73                                      | 0.960                               |
| 5.62                                    | 7.79                                | 4.32                                     | 7.50                                | 4.32                                      | 2.60                                |
| 6.29                                    | 10.3                                | 6.52                                     | 11.5                                | 6.29                                      | 5.26                                |
| 9.51                                    | 20.9                                | 8.69                                     | 16.0                                | 9.51                                      | 7.66                                |
| 12.1                                    | 33.9                                | 10.9                                     | 21.1                                | 12.1                                      | 9.85                                |
| 14.7                                    | 48.2                                | 14.7                                     | 24.3                                | 14.7                                      | 11.3                                |
| 17.3                                    | 59.5                                | 17.3                                     | 27.1                                | 21.7                                      | 15.8                                |
| <b>[Bmim]NTf<sub>2</sub></b>            |                                     | <b>[Bmim]OTf</b>                         |                                     | <b>[Em<sub>2</sub>pAm]NTf<sub>2</sub></b> |                                     |
| $10^3[\text{Amine}]/\text{M}$           | $10^3k_{\text{obsd}}/\text{s}^{-1}$ | $10^3[\text{Amine}]/\text{M}$            | $10^3k_{\text{obsd}}/\text{s}^{-1}$ | $10^3[\text{Amine}]/\text{M}$             | $10^3k_{\text{obsd}}/\text{s}^{-1}$ |
| 4.32                                    | 0.741                               | 1.73                                     | 1.53                                | 1.73                                      | 3.94                                |
| 6.92                                    | 2.94                                | 4.32                                     | 11.4                                | 4.32                                      | 12.1                                |
| 9.51                                    | 7.19                                | 6.92                                     | 22.9                                | 6.92                                      | 20.1                                |
| 12.1                                    | 10.7                                | 9.51                                     | 34.1                                | 8.51                                      | 28.0                                |
| 17.3                                    | 16.5                                | 12.1                                     | 47.3                                | 12.1                                      | 37.5                                |
| 21.7                                    | 23.1                                | 14.7                                     | 53.1                                | 14.7                                      | 43.2                                |
| -                                       | -                                   | 17.3                                     | 71.2                                | 17.3                                      | 52.7                                |
| <b>[B<sub>2</sub>mim]BF<sub>4</sub></b> |                                     | <b>[Bmpyrr]DCA</b>                       |                                     | <b>[Bmpyrr]NTf<sub>2</sub></b>            |                                     |
| $10^3[\text{Amine}]/\text{M}$           | $10^2k_{\text{obsd}}/\text{s}^{-1}$ | $10^3[\text{Amine}]/\text{M}$            | $10^2k_{\text{obsd}}/\text{s}^{-1}$ | $10^3[\text{Amine}]/\text{M}$             | $10^3k_{\text{obsd}}/\text{s}^{-1}$ |
| 2.17                                    | 4.74                                | 1.73                                     | 0.679                               | 6.92                                      | 2.08                                |
| 4.35                                    | 5.33                                | 4.32                                     | 3.27                                | 9.51                                      | 4.83                                |
| 6.52                                    | 7.11                                | 6.92                                     | 5.09                                | 12.1                                      | 9.16                                |
| 8.70                                    | 7.72                                | 9.51                                     | 7.43                                | 14.7                                      | 11.0                                |
| 10.9                                    | 8.51                                | 12.1                                     | 9.15                                | 17.3                                      | 16.5                                |
| 14.1                                    | 10.0                                | 14.7                                     | 10.4                                | 21.7                                      | 23.1                                |
| 17.4                                    | 11.5                                |                                          |                                     |                                           |                                     |
| <b>[Bmpyrr]OTf</b>                      |                                     | <b>[Bm<sub>2</sub>im]NTf<sub>2</sub></b> |                                     |                                           |                                     |
| $10^3[\text{Amine}]/\text{M}$           | $10^3k_{\text{obsd}}/\text{s}^{-1}$ | $10^3[\text{Amine}]/\text{M}$            | $10^3k_{\text{obsd}}/\text{s}^{-1}$ |                                           |                                     |
| 1.73                                    | 2.75                                | 1.73                                     | 0.262                               |                                           |                                     |
| 4.32                                    | 12.2                                | 4.32                                     | 6.43                                |                                           |                                     |
| 6.92                                    | 25.3                                | 6.92                                     | 14.2                                |                                           |                                     |
| 9.51                                    | 37.8                                | 9.51                                     | 22.6                                |                                           |                                     |
| 12.1                                    | 49.8                                | 12.1                                     | 29.8                                |                                           |                                     |
| 14.7                                    | 52.8                                | 14.7                                     | 35.7                                |                                           |                                     |
| 17.3                                    | 72.8                                | 17.3                                     | 47.2                                |                                           |                                     |

Pseudo first-order rate constants were reproducible within a  $\pm 5\%$

**Table S2:** Pseudo-first-order rate constants ( $k_{\text{obsd}}$ ) for the reaction of **1** with piperidine in organic solvents (COS) at 25°C.

| <b>H<sub>2</sub>O pH= pK<sub>a</sub></b> |                                                     | <b>DMSO</b>               |                                                     | <b>Acetonitrilo</b>       |                                                     |
|------------------------------------------|-----------------------------------------------------|---------------------------|-----------------------------------------------------|---------------------------|-----------------------------------------------------|
| 10 <sup>3</sup> [Amine]/M                | 10 <sup>3</sup> $k_{\text{obsd}}$ / s <sup>-1</sup> | 10 <sup>3</sup> [Amine]/M | 10 <sup>3</sup> $k_{\text{obsd}}$ / s <sup>-1</sup> | 10 <sup>3</sup> [Amine]/M | 10 <sup>3</sup> $k_{\text{obsd}}$ / s <sup>-1</sup> |
| 1.73                                     | 1.95                                                | 1.73                      | 1.15                                                | 1.73                      | 2.90                                                |
| 4.32                                     | 3.71                                                | 4.32                      | 2.49                                                | 4.32                      | 6.78                                                |
| 6.92                                     | 7.40                                                | 6.92                      | 4.88                                                | 6.29                      | 11.5                                                |
| 9.51                                     | 12.0                                                | 9.51                      | 7.32                                                | 9.51                      | 16.2                                                |
| 12.1                                     | 15.9                                                | 12.1                      | 8.50                                                | 12.1                      | 21.4                                                |
| 14.7                                     | 18.1                                                | 14.7                      | 10.5                                                | 14.7                      | 26.3                                                |
| 17.3                                     | 21.1                                                | 17.3                      | 11.9                                                | 17.3                      | 29.8                                                |
| -                                        | -                                                   | 21.7                      | 14.6                                                | 21.7                      | 37.9                                                |

Pseudo first-order rate constants were reproducible within a  $\pm$  5%

**Table S3:** Relative products distribution (%) for the nucleophilic attack of piperidine to **1** in the solvent used.

| <b>Solvent</b>                       | <b>% S<sub>N</sub>2(P)</b> | <b>% S<sub>N</sub>Ar</b> |
|--------------------------------------|----------------------------|--------------------------|
| H <sub>2</sub> O                     | 26                         | 74                       |
| EtOH:H <sub>2</sub> O (50% v/v)*     | 30                         | 70                       |
| ACN                                  | 15                         | 85                       |
| DMSO                                 | 49                         | 51                       |
| [Bmim]BF <sub>4</sub>                | 20                         | 80                       |
| [Bmim]PF <sub>6</sub>                | 6                          | 94                       |
| [Bmim]DCA                            | 100                        | 0                        |
| [Bmim]OTf                            | 31                         | 69                       |
| [Bmim]NTf <sub>2</sub>               | 8                          | 92                       |
| [Bmpyrr]NTf <sub>2</sub>             | 12                         | 88                       |
| [Em2pAm]NTf <sub>2</sub>             | 14                         | 86                       |
| [B <sub>2</sub> mim]NTf <sub>2</sub> | 10                         | 90                       |
| [B <sub>2</sub> mim]BF <sub>4</sub>  | 15                         | 85                       |
| [Bmpyrr]OTf                          | 25                         | 75                       |
| [Bmpyrr]DCA                          | 100                        | 0                        |
| [Bmpy]DCA                            | 100                        | 0                        |

\* ref 24

**Table S4:**  $\pi^*$  Kamlet-Taft 's parameters ( $\alpha$ ,  $\beta$ ,  $\pi^*$ )

| Solvente                              | $\pi^*$ | $\alpha$ | $\beta$ |
|---------------------------------------|---------|----------|---------|
| [Bmim]BF <sub>4</sub>                 | 1.08    | 0.613    | 0.376   |
| [Bmim]PF <sub>6</sub>                 | 1.03    | 0.634    | 0.209   |
| [Bmim]DCA                             | 1.13    | 0.464    | 0.708   |
| [Bmim]NTf <sub>2</sub>                | 1.09    | 0.940    | 0.230   |
| [Bmim]OTf                             | 1.01    | 0.625    | 0.464   |
| [Em <sub>2</sub> pAm]NTf <sub>2</sub> | 0.97    | 0.470    | --      |
| [Bm <sub>2</sub> im]BF <sub>4</sub>   | 1.08    | 0.400    | 0.360   |
| [Bmpyrr]DCA                           | --      | --       | --      |
| [Bmpyrr]NTf <sub>2</sub>              | 0.971   | 0.409    | 0.243   |
| [Bmpyrr]OTf                           | 1.02    | 0.400    | 0.460   |
| [Bm <sub>2</sub> im]NTf <sub>2</sub>  | 0.987   | 0.384    | 0.299   |
| [Bmpy]DCA.                            | 1.03    | 0.370    | --      |
| H <sub>2</sub> O pH=pKa.              | 1.33    | 1.12     | 0.500   |
| DMSO                                  | 1.00    | 0        | 0.760   |
| Acetonitrilo                          | 0.799   | 0.350    | 0.370   |
| EtOH:H <sub>2</sub> O                 | 1.01    | 0.940    | 0.650   |

1. Chiappe, C.; Pomelli, C.; Rajamani, S. *J. Phys. Chem. B*, **2011**, *115*, 9653.

2. Jessop, P.; Jessop, D.; FU, D.; Phan, L. *Green Chem.* **2012**, *14*, 1245.

**Table S5:** Statistical data from the multiple regression procedure including  $\alpha$ ,  $\beta$ ,  $\pi^*$  Kamlet-Taft's parameters

| LSER equation | F <sup>a</sup> | R <sup>b</sup> | $\alpha$    | $\beta$    | $\pi^*$     |
|---------------|----------------|----------------|-------------|------------|-------------|
| 3             | 31             | 0.92           | -0.45(0.45) | 3.68(0.56) | -0.04(1.69) |
| 4             | 57             | 0.93           | -0.45(0.33) | 3.67(0.38) |             |
| 5             | 47             | 0.92           |             | 4.00(0.45) | -1.05(1.34) |
| 6             | 160            | 0.95           |             | 3.79(0.29) |             |

<sup>a</sup> Statistical F. <sup>b</sup> Correlation coefficient. <sup>c</sup> Standard deviations are given in parentheses.

**Figure S1:**  $^{31}\text{P}$ -NMR spectrum (400MHz) of *O,O*-diethyl piperidinophosphate diester (**2a**) obtained in the reaction of *O,O*-diethyl chlorophosphate with piperidine in  $[\text{Bmim}]\text{BF}_4$ .

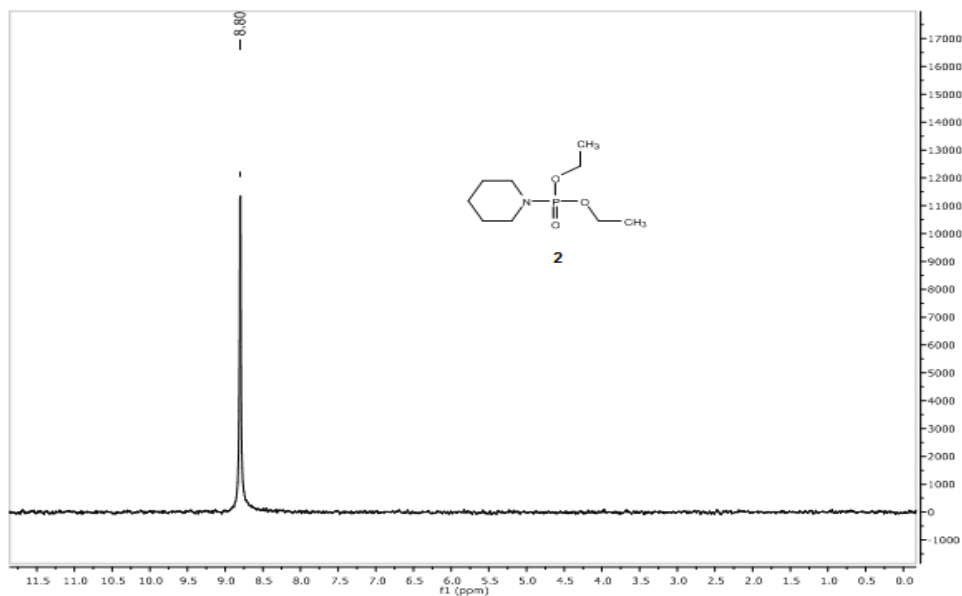

**Figure S2:**  $^{31}\text{P}$ -NMR spectrum (400MHz) of *O,O*-diethyl phosphate acid (**2b**) obtained in the reaction of *O,O*-diethyl chlorophosphate with NaOH in  $[\text{Bmim}]\text{BF}_4$ .

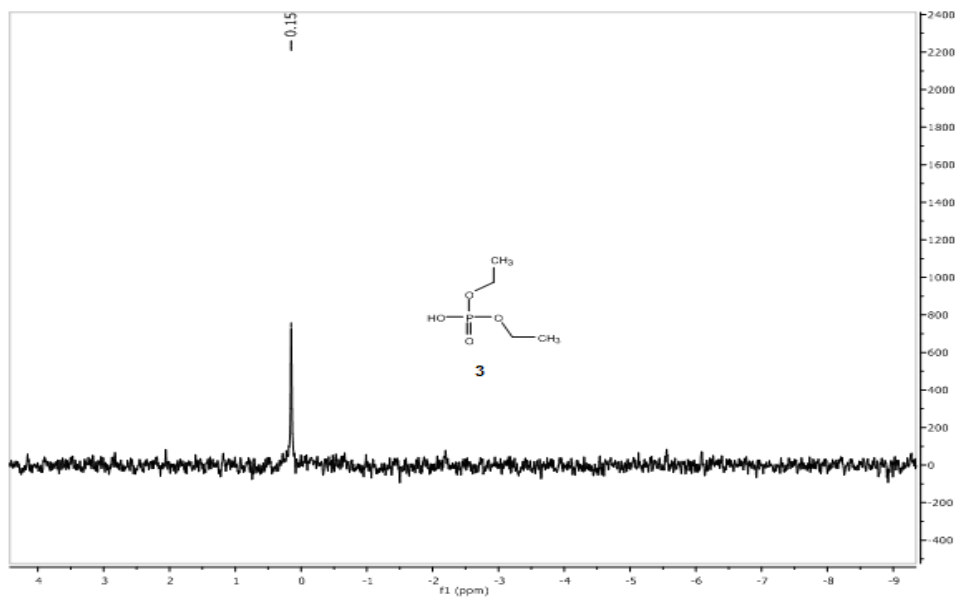

**Figure S3:**  $^{31}\text{P}$ -NMR spectrum for the reaction of **1** with piperidine in  $[\text{Bmim}]\text{PF}_6$  at  $25^\circ\text{C}$ .

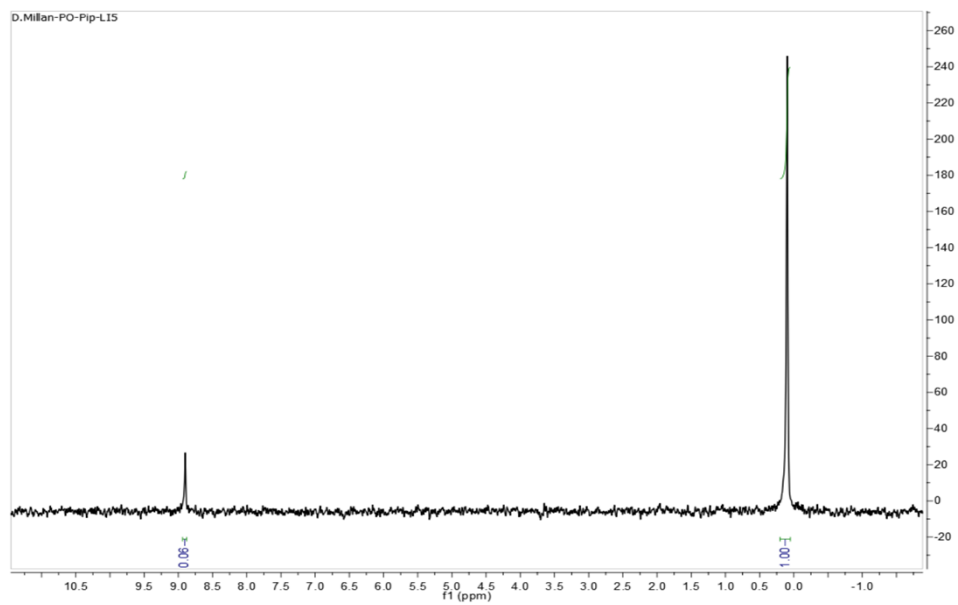

**Figure S4:**  $^{31}\text{P}$ -NMR spectrum for the reaction of **1** with piperidine in  $[\text{Bmim}]\text{NTf}_2$  at  $25^\circ\text{C}$ .

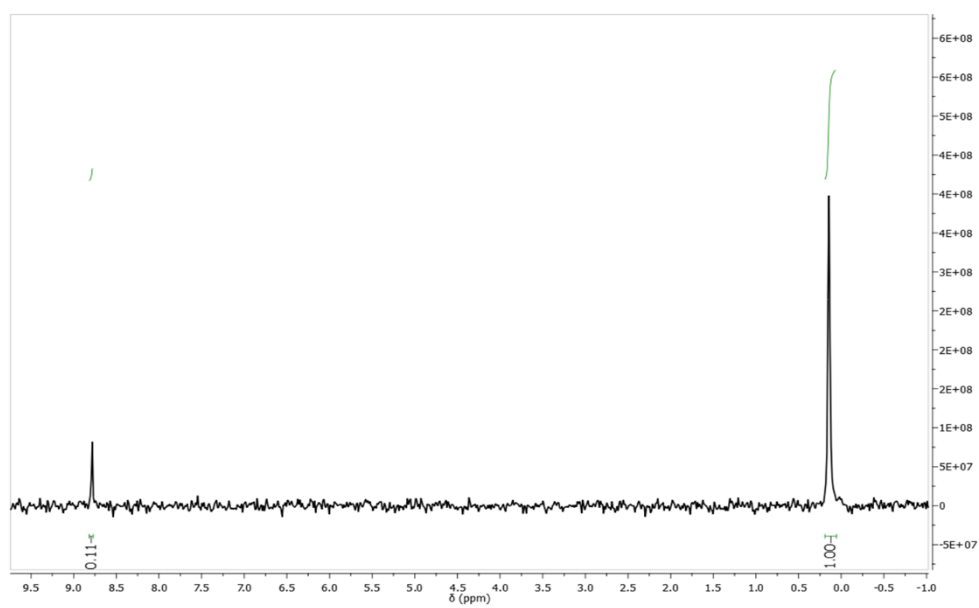



**Figure S5:**  $^{31}\text{P}$ -NMR spectrum for the reaction of **1** with piperidine in [Bmim]OTf at 25°C.

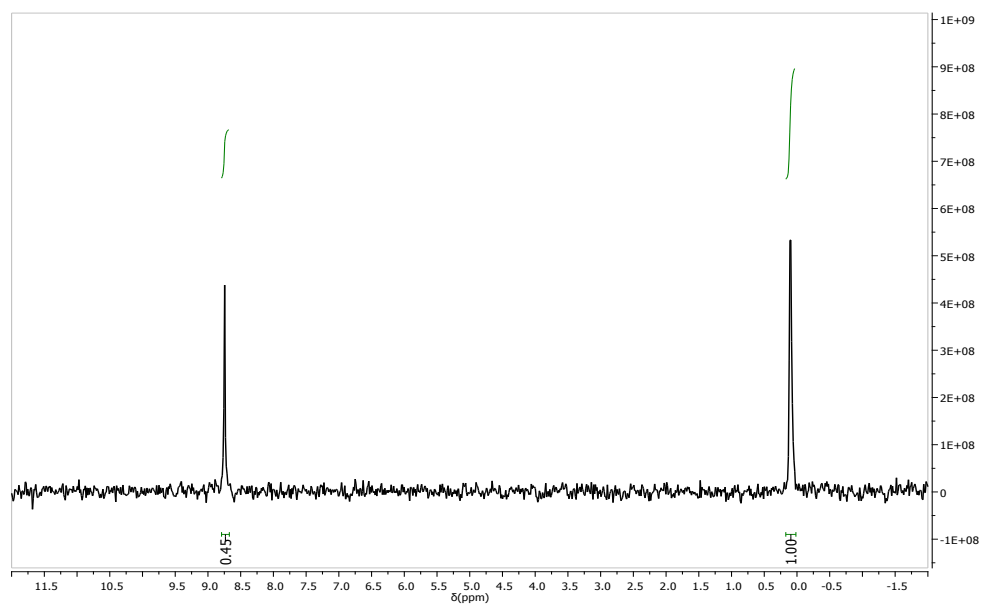

**Figure S6:**  $^{31}\text{P}$ -NMR spectrum for the reaction of **1** with piperidine in [Em<sub>2</sub>pAm]NTf<sub>2</sub> at 25°C.

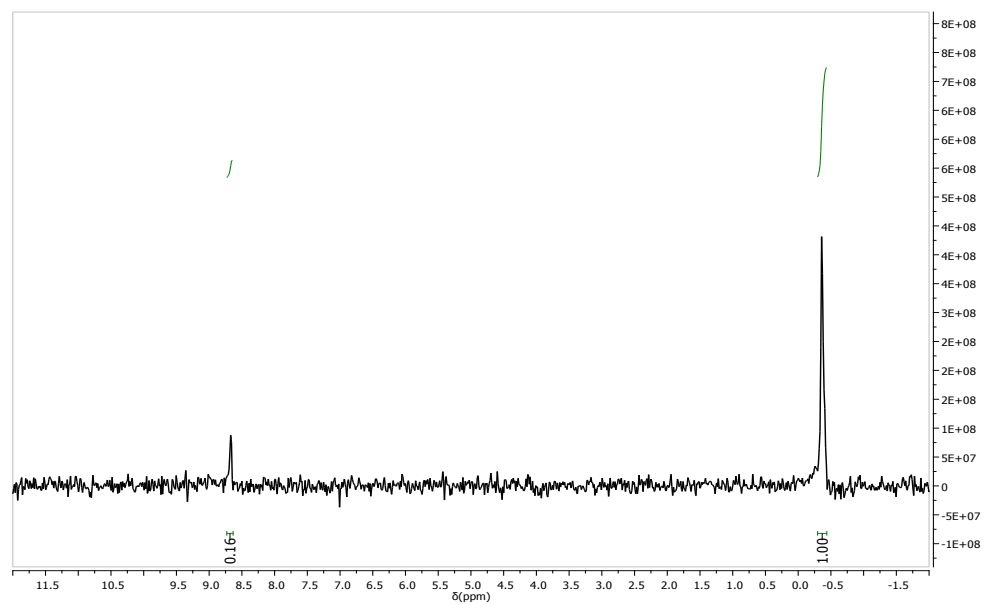

**Figure S7:**  $^{31}\text{P}$ -NMR spectrum for the reaction of **1** with piperidine in  $[\text{B}_2\text{mim}]\text{BF}_4$  at  $25^\circ\text{C}$ .

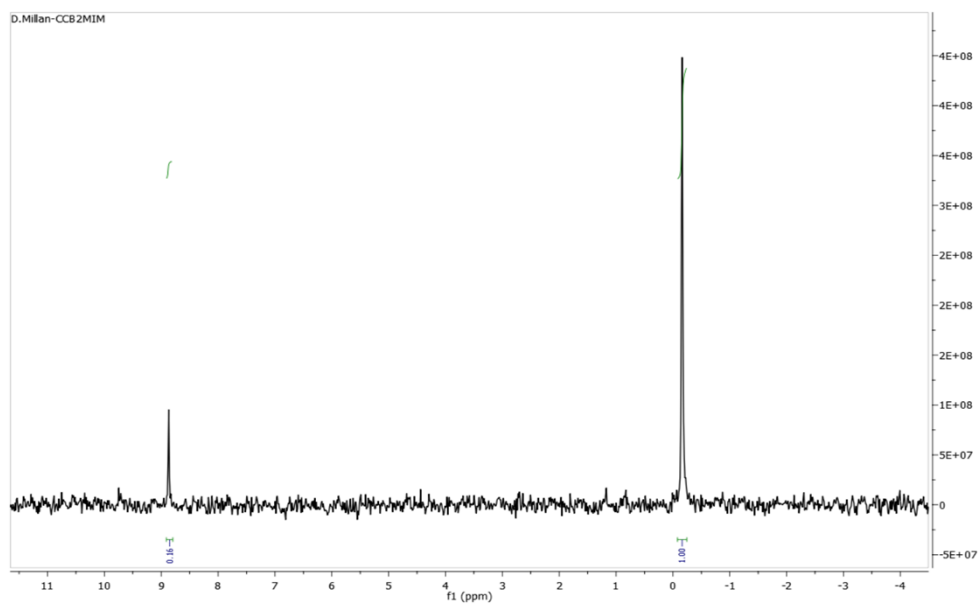

**Figure S8:**  $^{31}\text{P}$ -NMR spectrum for the reaction of **1** with piperidine in  $[\text{Bmpyr}]\text{NTf}_2$  at  $25^\circ\text{C}$ .

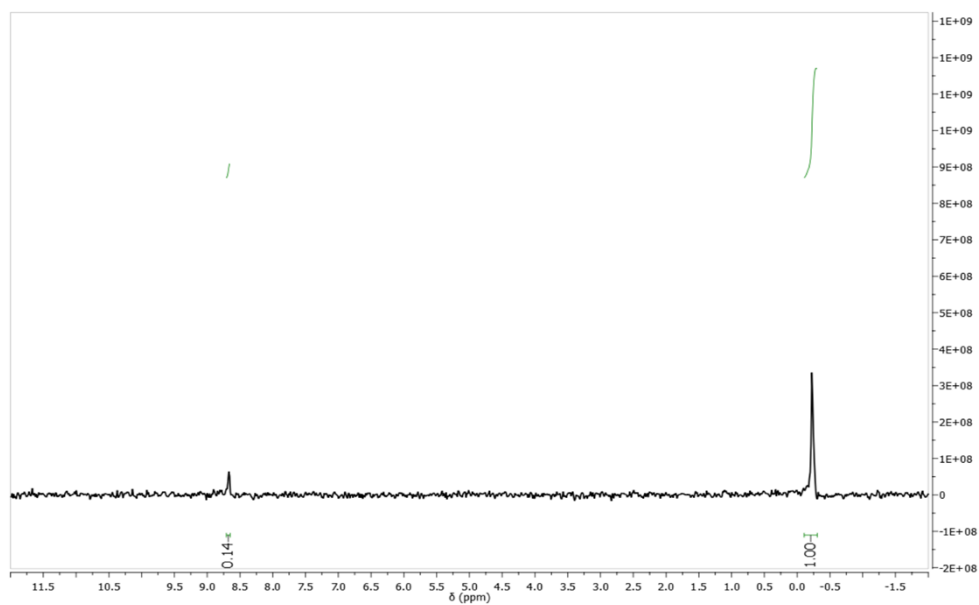

**Figure S9:**  $^{31}\text{P}$ -NMR spectrum for the reaction of **1** with piperidine in [Bmpyrr]OTf at 25°C.

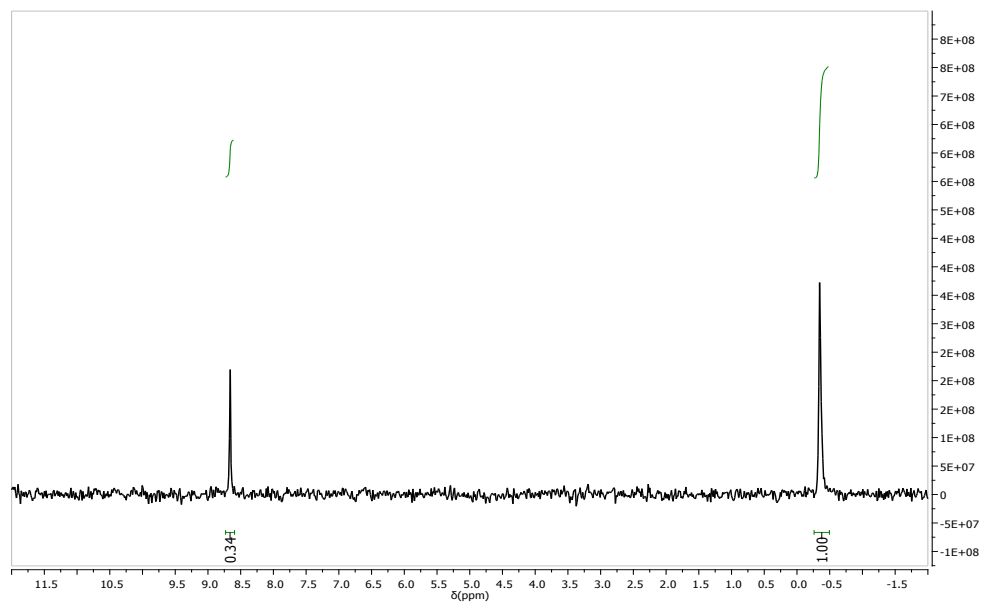

**Figure S10:**  $^{31}\text{P}$ -NMR spectrum for the reaction of **1** with piperidine in [B<sub>2</sub>mim]NTf<sub>2</sub> at 25°C.

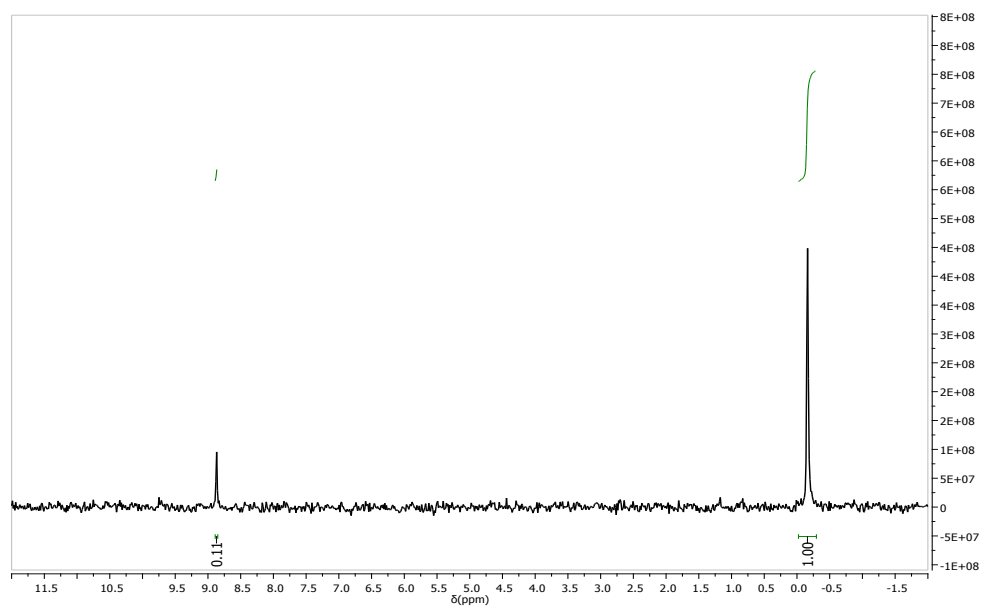

**Figure S11:**  $^{31}\text{P}$ -NMR spectrum for the reaction of **1** with piperidine in  $\text{H}_2\text{O}$  ( $\text{pH}=\text{p}K_a$ ) at  $25^\circ\text{C}$ .

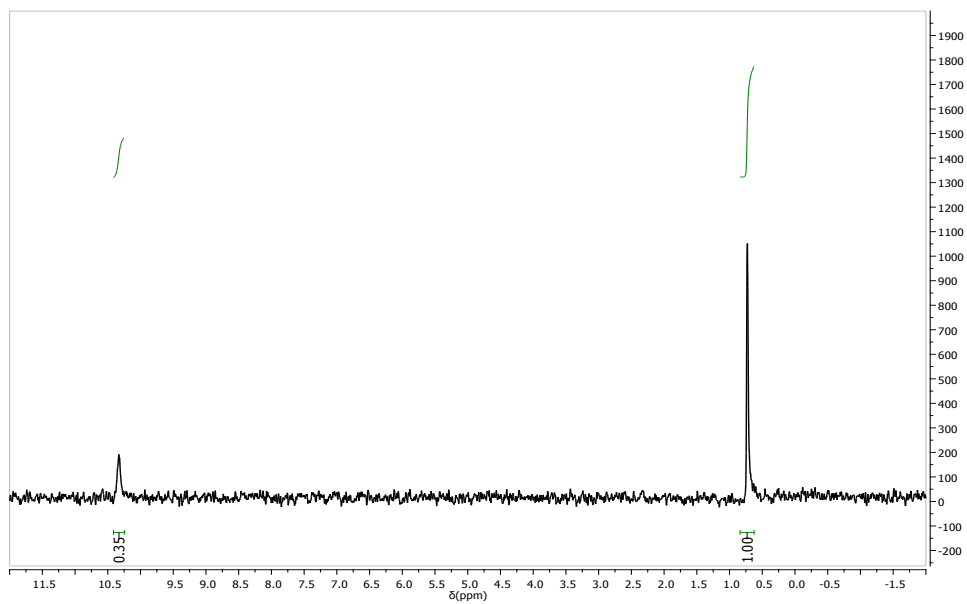

**Figure S12:**  $^{31}\text{P}$ -NMR spectrum for the reaction of **1** with piperidine in DMSO at  $25^\circ\text{C}$ .

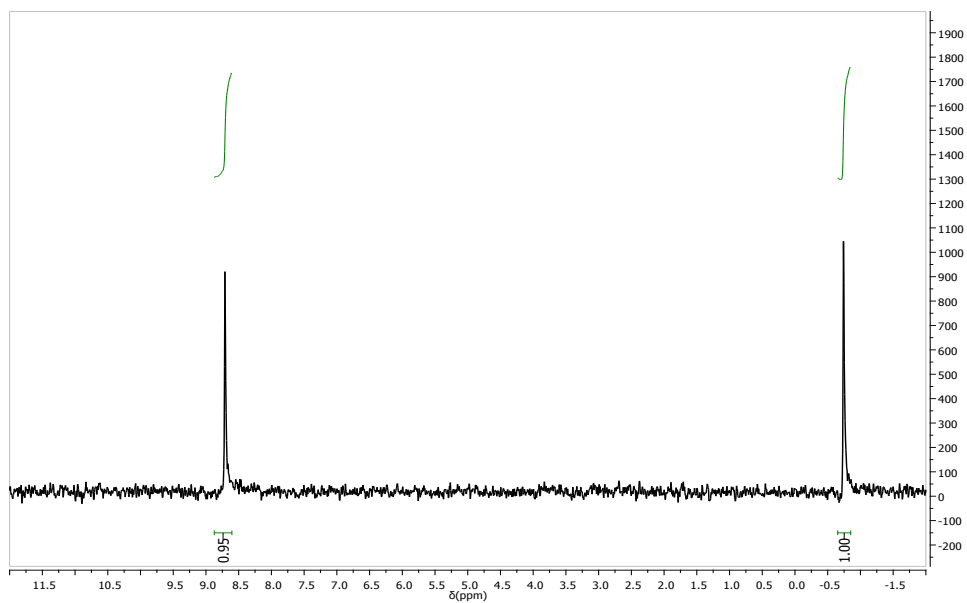

**Figure S13:**  $^{31}\text{P}$ -NMR spectrum for the reaction of **1** with piperidine in acetonitrile at  $25^\circ\text{C}$

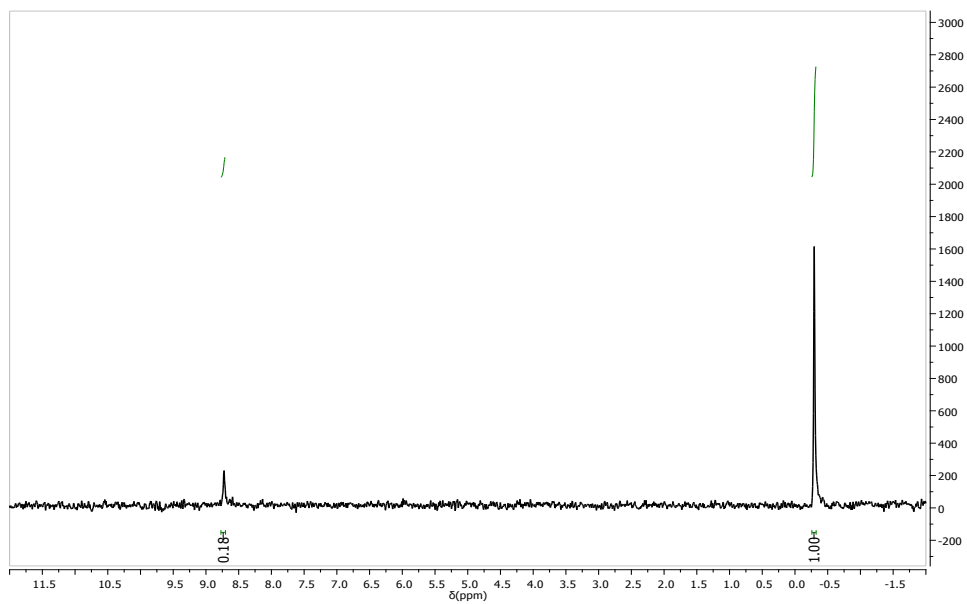

**Figure S14:**  $^{31}\text{P}$ -NMR spectrum for the reaction of **1** with piperidine in [Bmim]DCA at  $25^\circ\text{C}$ .

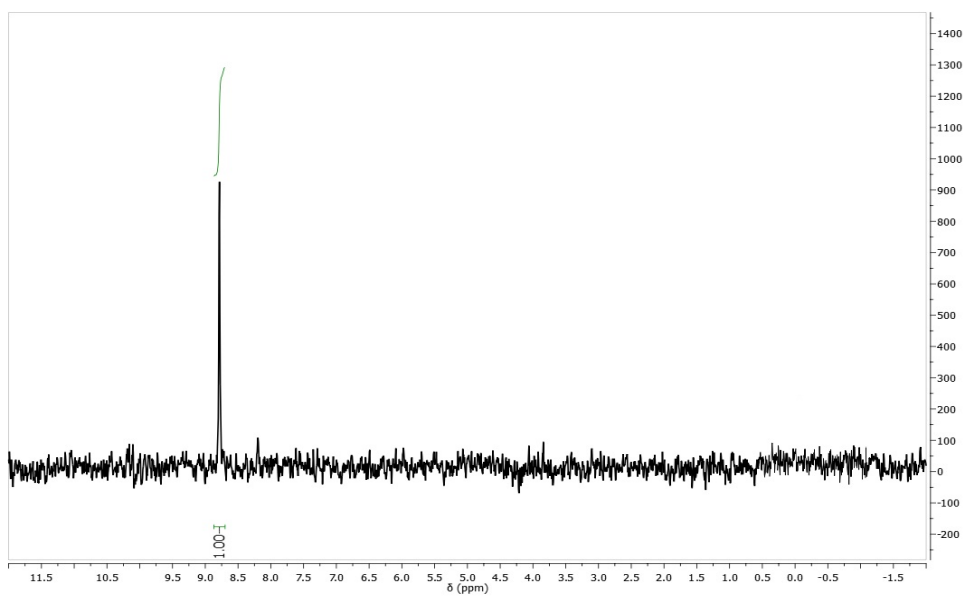

**Figure S15:**  $^{31}\text{P}$ -NMR spectrum for the reaction of **1** with piperidine in [Bmpyrr]DCA at 25°C.

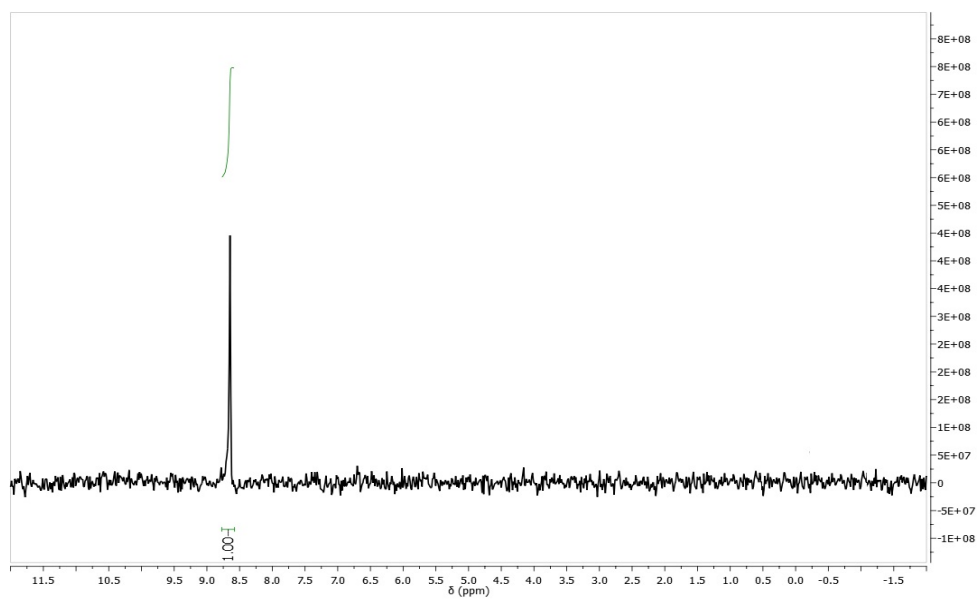

**Figure S16:**  $^{31}\text{P}$ -NMR spectrum for the reaction of **1** with in [Bmpy]DCA at 25°C.

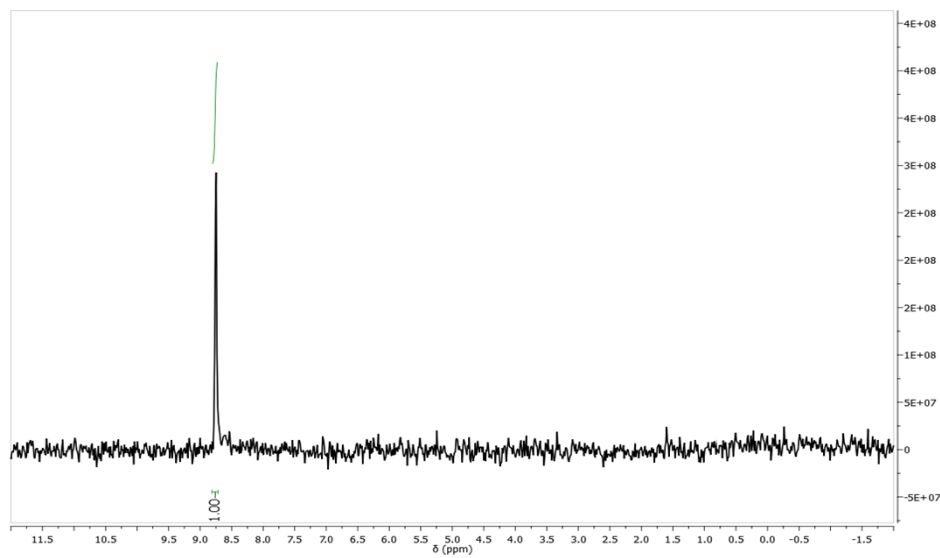

**Figure S17:** Correlation between  $\log k_N^{Ar}$  and the solvent hydrogen bond acceptor capacity ( $\beta$ ) for a series of ionic liquids.

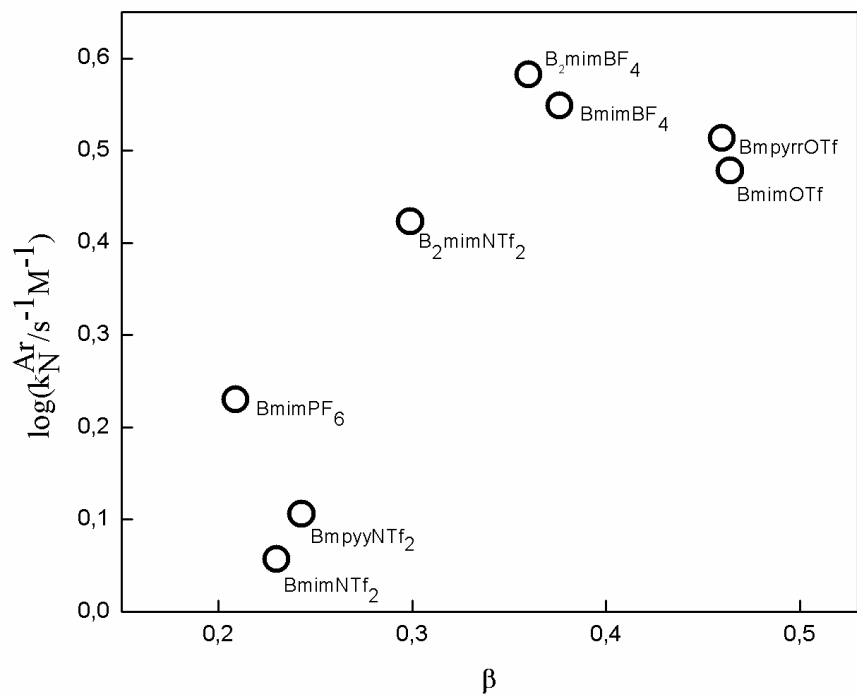

Supplement: c4nj02121e1.pdf [file c4nj02121e1.pdf]
